# Supplementary material for: Genetic activation of Nrf2 reduces cutaneous symptoms in a murine model of Netherton syndrome
Source: Oxford University Press journal article supplement (doi:10.1242/dmm.042648), 2020-01-01
Supplement: dmm042648supp.pdf [file dmm042648supp.pdf]

**Table S1. List of primers used for qRT-PCR and genotyping**

| Gene          | Forward sequence           | Reverse sequence           |
|---------------|----------------------------|----------------------------|
| <i>Ccl20</i>  | TGACTCTTAGGCTGAGGAGGT      | AGCAGCAAGCAACTACGACT       |
| <i>Gapdh</i>  | TCGTGGATCTGACGTGCCGCCTG    | CACCACCCTGTTGCTGTAGCCGTAT  |
| <i>Gclm</i>   | TCCCATGCAGTGGAGAAGAT       | AGCTGTGCAACTCCAAGGAC       |
| <i>Gsta3</i>  | TACTTTGATGGCAGGGGAAG       | GCACTTGCTGGAACATCAGA       |
| <i>Icam1</i>  | TCCGCTGTGCTTTGAGAACT       | TCCGGAAACGAATACACGGT       |
| <i>Il6</i>    | CCGGAGAGGAGACTTCACAG       | TTCTGCAAGTGCATCATCGT       |
| <i>Il13</i>   | TCACACAAGACCAGACTCCCC      | CTCCTCATTAGAAGGGGCCG       |
| <i>Il1b</i>   | GGACAGAATATCAACCAACAAGTG   | TGCTGATGTACCAGTTGGGG       |
| <i>Il33</i>   | GGTTTGCTTTAGAGAGGGTCCA     | ACAATCATTGTTTAGAACCAAGGAA  |
| <i>Nqo1</i>   | GTCTGCAGCTTCCAGCTTCT       | CTGGCCCATTTCAGAGAAGAC      |
| <i>S100a8</i> | GCCGTCTGAACTGGAGAAG        | GTGAGATGCCACACCCACTTT      |
| <i>S100a9</i> | CGCAGCATAACCACCATCAT       | AAGATCAACTTTGCCATCAGC      |
| <i>Sipi</i>   | CGGCAAATACAAGTGCTGTG       | CCTGGGAGCAGGGAAGTAGT       |
| <i>Srxn1</i>  | CGGTGCACAACGTACCAAT        | TTGATCCAGAGGACGTCGAT       |
| <i>Tarc</i>   | AATGTAGGCCGAGAGTGCTG       | ACAGTCAGAAACACGATGGCA      |
| <i>Tnfa</i>   | GACCCTCACACTCAGATCATCTTCT  | CCACTTGGTGGTTTGCTACGA      |
| <i>Tslp</i>   | CGACAGCATGGTTCTTCTCA       | CGATTTGCTCGAACTTAGCC       |
| <i>NQO1</i>   | GTGATATTCCAGTTCCCCCTGC     | AAGCACTGCCTTCTTACTCCGG     |
| <i>SLPI</i>   | AAT GCC TGG ATC CTG TTG AC | AAA GGA CCT GGA CCA CAC AG |

| Gene              | Forward sequence            | Reverse sequence            |
|-------------------|-----------------------------|-----------------------------|
| <i>RPL27</i>      | TCA CCT AAT GCC CAC AAG GTA | CCA CTT GTT CTT GCC TGT CTT |
| Genotyping        | Forward sequence            | Reverse sequence            |
| <i>caNrf2</i>     | CGGCTCAGCACCTTGTATC         | CTTATTCCAAGCGGCTTCGGC       |
| <i>Cre</i>        | AACATGCTTCATCGTCGG          | TTCGGATCATCAGCTACACC        |
| <i>Spink5</i> mut | GGAATGTGATGAAAGAAATAAAAGC   | CATCCATTAGTTTATCTCTTACTCCAG |
| <i>Spink5</i> wt  | GGCATATAGTGTGTTTGGAGC       | CATCCATTAGTTTATCTCTTACTCCAG |

**Table S2. List of antibodies used for immunofluorescence staining**

| Antigen                   | Species | Manufacturer and catalogue number/clone number                                |
|---------------------------|---------|-------------------------------------------------------------------------------|
| CD3                       | Rabbit  | DAKO, Glostrup, Denmark; #A0452; 1:100 diluted                                |
| Cdsn                      | Mouse   | gift from Prof. Dr. Guy Serre, University of Toulouse, France, 1:500 diluted. |
| K14                       | Rabbit  | Covance, Princeton, NJ, #PRB-155P; 1: 50,000 diluted                          |
| K6                        | Rabbit  | Covance, NJ; #PRB-169P; 1:1000 diluted                                        |
| Loricrin                  | Rabbit  | Covance, NJ, #PRB-145P; 1:200 diluted                                         |
| Ly-6G                     | Rat     | BD Bioscience, San Jose, CA; clone 49-H4; 1: 100 diluted                      |
| MSL                       | Rat     | Abcam, Cambridge, UK; ab15635; 1:200 diluted                                  |
| Slpi                      | Rabbit  | Santa Cruz Biotechnology, Santa Cruz, CA; #sc28803, 1:100 diluted             |
| Mouse IgG - Cy3           | Goat    | Jackson ImmunoResearch, West Grove, AP; #115-165-00; 1:500 diluted            |
| Rabbit IgG - biotinylated | Goat    | Jackson ImmunoResearch, #111-065-003; 1:500 diluted                           |
| Rabbit IgG - Cy3          | Goat    | Jackson ImmunoResearch, #111-165-003, 1:500 diluted                           |
| Rat IgG - biotinylated    | Rabbit  | Vector Laboratories, Burlingame, CA; #BA-4001; 1:200 diluted                  |
